# Supplementary material for: HuR-Dependent Editing of a New Mineralocorticoid Receptor Splice Variant Reveals an Osmoregulatory Loop for Sodium Homeostasis
Source: PubMed Central journal article supplement (PMC5500589; doi:10.1038/s41598-017-04838-8), 2017-07-06
Supplement: 41598_2017_4838_MOESM1_ESM.pdf [file 41598_2017_4838_MOESM1_ESM.pdf]

# HuR-Dependent Editing of a New Mineralocorticoid Receptor Splice Variant Reveals an Osmoregulatory Loop for Sodium Homeostasis

Ingrid Lema<sup>1</sup>, Larbi Amazit<sup>1,2</sup>, Khadija Lamribet<sup>1</sup>, Jérôme Fagart<sup>1</sup>, Anne Blanchard<sup>3</sup>, Marc Lombès<sup>1,4¶</sup>, Nadia Cherradi<sup>5,6,7¶</sup>, Say Viengchareun<sup>1¶</sup>.

## ¶ Senior authors who equally contributed to this work

<sup>1</sup> Inserm U1185, Fac Med Paris Sud, Université Paris-Saclay, F-94276, Le Kremlin-Bicêtre, France;

<sup>2</sup> UMS 32, Le Kremlin Bicêtre, 94276, France;

<sup>3</sup> Inserm, Centre d'Investigations Cliniques 9201, F-75015 Paris, France;

<sup>4</sup> Assistance Publique-Hôpitaux de Paris, Hôpital de Bicêtre, Service d'Endocrinologie et des Maladies de la Reproduction, Le Kremlin Bicêtre F-94275, France;

<sup>5</sup> Institut National de la Santé et de la Recherche Médicale, Inserm U1036, Grenoble, France, F-38000

<sup>6</sup> Commissariat à l'Énergie Atomique et aux Énergies Alternatives, Institut de Biosciences et Biotechnologies de Grenoble, Laboratoire Biologie du Cancer et de l'Infection, Grenoble, F- 38000, France;

<sup>7</sup> Université Grenoble Alpes, Unité Mixte de Recherche-S1036, Grenoble, F-38000, France.

## Correspondence should be addressed to:

Marc Lombès, MD, PhD or Say Viengchareun, PhD  
Inserm U1185, Faculté de Médecine Paris-Sud  
63 rue Gabriel Peri, F-94276, Le Kremlin-Bicêtre, France  
E-mail: [marc.lombes@u-psud.fr](mailto:marc.lombes@u-psud.fr) or [say.viengchareun@u-psud.fr](mailto:say.viengchareun@u-psud.fr)  
Phone: 33 1 49 59 67 02  
Fax: 33 1 49 59 67 32

Or

Nadia Cherradi, PhD  
INSERM U1036, BCI  
Institut de Biosciences et Biotechnologies de Grenoble, CEA Grenoble  
17, rue des Martyrs  
38054 Grenoble Cedex 09, France  
E-mail: [nadia.cherradi@cea.fr](mailto:nadia.cherradi@cea.fr)  
Phone: 33 4 38 78 35 01  
Fax: 33 4 38 78 50 58

**Running headline:** Tonicity dictates HuR-dependent MR transcript editing

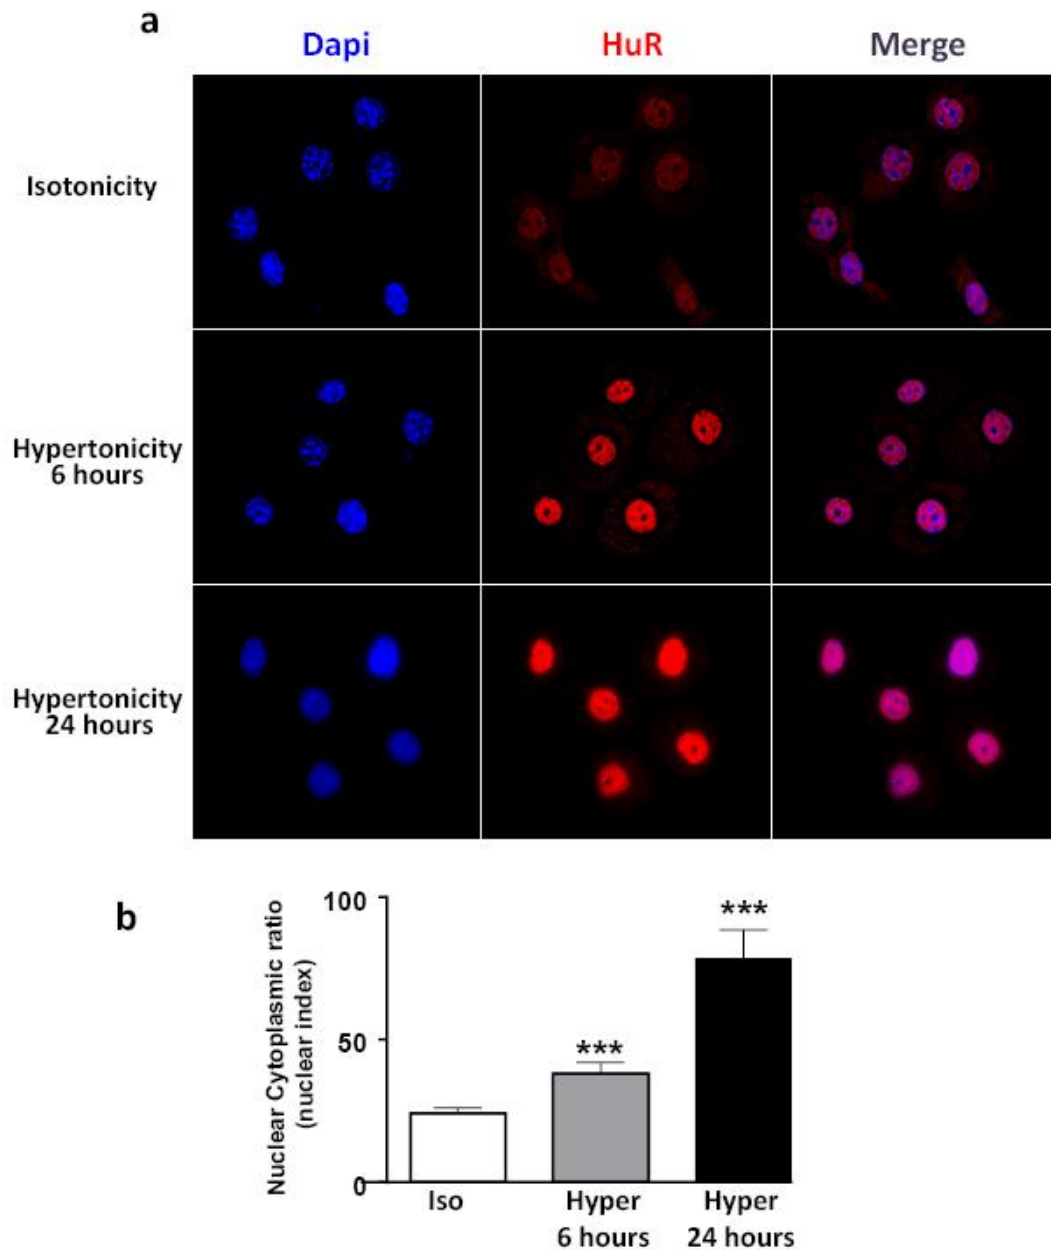

**Figure S1. Hypertonicity increases HuR nuclear localization in renal cells.**

KC3AC1 cells were incubated for 6 or 24 hours under isotonic (Iso) or hypertonic (Hyper) conditions. Immunocytochemistry for HuR was performed as described in the Methods section, with the 3A2 anti-HuR antibody. The nuclei were stained with DAPI (blue). Representative images of the subcellular localization of HuR (Supplementary Fig. S1a). HuR nuclear staining was increased under hypertonic conditions compared to isotonic conditions. This result was corroborated by the subcellular trafficking of HuR protein quantification with a high-throughput microscopy (HTM) analysis, as shown in Supplementary Fig. S1b. The results are expressed as the mean ratio of nuclear to cytoplasmic fluorescence  $\pm$  SEM ( $n > 2800$  cells). Bar, 25  $\mu$ m. \*\*\* $P < 0.001$ ; NS=not significant (Mann-Whitney U-tests).

**Supplementary Table S1**

**Summary of the functional consequences in terms of FL MR and  $\Delta 6$  MR expression in response to osmotic stresses *in vitro* (KC3AC1 cells) and *in vivo* (Challenges in mouse models).**

| <b>Stress</b>               | <b>Luminal osmolarity</b> | <b>Na delivery</b> | <b>FL MR</b> | <b><math>\Delta 6</math> MR</b> | <b><math>\Delta 6</math>/FL ratio</b> |
|-----------------------------|---------------------------|--------------------|--------------|---------------------------------|---------------------------------------|
| <b>KC3AC1 cells</b>         |                           |                    |              |                                 |                                       |
| Hypertonicity               | ↑                         | -                  | →            | ↑                               | ↑↑                                    |
| Hypotonicity                | ↓                         | -                  | ↑            | →                               | ↓                                     |
| <b><i>In vivo</i></b>       |                           |                    |              |                                 |                                       |
| High Na <sup>+</sup> intake | ↑                         | ↑                  | →            | ↑                               | ↑                                     |
| Furosemide                  | ↑↑                        | ↑                  | ↓            | ↑↑                              | ↑↑                                    |
| Water deprivation           | ↑                         | →                  | →            | →                               | →                                     |
| Water load                  | ↓                         | →                  | →            | ↓                               | ↓                                     |

## Supplementary Table S2

All primer sequences are shown 5' to 3'.

Primer sequences used for site-directed mutagenesis to generate the mutR3 mutant

| <i>Name</i> | <i>Forward primer</i> | <i>Reverse primer</i> |
|-------------|-----------------------|-----------------------|
| Δ6 MR       | AGAGAAGATGCATCAGTCTG  | CTGGAAGTACCTTGCC      |

Primer sequences used in RT-qPCR

| <i>Name</i>           | <i>Accession number</i> | <i>Amplicon size (bp)</i> | <i>Forward primer</i> | <i>Reverse primer</i>  |
|-----------------------|-------------------------|---------------------------|-----------------------|------------------------|
| HuR ( <i>Elavl1</i> ) | NM_010485.3             | 87                        | CAGCCAATCCCAACCAGAA   | TGGTGTACAGGGCCTCCAAA   |
| 36b4 ( <i>Rplp0</i> ) | NM_007475.5             | 128                       | AGCGCGTCTGGCATTGTCTGT | GGGCAGCAGTGGTGGCAGCAGG |

Oligonucleotide sequences of forward (f) and reverse (r) primers and Taqman probes (p)

| <i>cDNA</i> | <i>Accession number</i> | <i>Primer</i> | <i>Sequence (5'-3')</i>                                        |
|-------------|-------------------------|---------------|----------------------------------------------------------------|
| FL MR       | NM_001083906.1          | f             | TCGTTTGCCTTGAGTTGGAGAT                                         |
|             |                         | r             | TGCATCAGTCTGCCATGTATGA                                         |
|             |                         | p             | TACAAACATACGAACAGCC                                            |
| Δ6 MR       | NM_001083906.1          | f             | CAGATGATCCAAGTCGTGAAGTG                                        |
|             |                         | r             | GTATGAGCTGTGCCAGGGGA                                           |
|             |                         | p             | TACTCCAGAGAGAAGATG                                             |
| 18s         | NR_003278.3             | f             | TAGAGGGACAAGTGGCGTTCA                                          |
|             |                         | r             | TGTGATGCCCTTAGATGTCCG                                          |
|             |                         | p             | ACCCGAGATTGAGCAAT                                              |
| Gapdh       | NM_008084.3             | f<br>r/p      | Unknown (provided by ThermoFisher Scientific)<br>Mm99999915_g1 |

## Supplementary Table S3

### Antibodies for western blot analysis

| <i>Name (Provider)</i>                      | <i>Species</i> | <i>Protein</i>    | <i>Molecular weight (kDa)</i> | <i>Dilution</i>            |
|---------------------------------------------|----------------|-------------------|-------------------------------|----------------------------|
| <b>Primary Antibodies</b>                   |                |                   |                               |                            |
| 39N                                         | Rabbit         | MR                | 130 kDa                       | 1:1000 or 1:5000 (tissues) |
| $\alpha$ -tubulin (Sigma)                   | Mouse          | $\alpha$ -tubulin | 50 kDa                        | 1:10000                    |
| 3A2 (Santa Cruz)                            | Mouse          | HuR               | 36 kDa                        | 1:500                      |
| <b>Secondary Antibodies</b>                 |                |                   |                               |                            |
| Dylight Anti-Rabbit 800 (Fisher Scientific) | Goat           | Rabbit IgG        |                               | 1:15000                    |
| Dylight Anti-Mouse 680 (Fisher Scientific)  | Rabbit         | Mouse IgG         |                               | 1:15000                    |
| Dylight Anti-Rabbit 680 (Fisher Scientific) | Goat           | Rabbit IgG        |                               | 1:15000                    |
| Dylight Anti-Mouse 800 (Fisher Scientific)  | Rabbit         | Mouse IgG         |                               | 1:15000                    |

NB: TBST (50 mM Tris-HCl pH 7.4, 150 mM NaCl, 0.1% Tween 20), Blocking Buffer (Li-Cor)

### Antibodies for immunohistochemistry

| <i>Name (Provider)</i>                   | <i>Species</i> | <i>Protein</i> | <i>Dilution</i> |
|------------------------------------------|----------------|----------------|-----------------|
| <b>Primary Antibodies</b>                |                |                |                 |
| 3A2 (Santa Cruz)                         | Mouse          | HuR            | 1: 500          |
| 39N                                      | Rabbit         | MR             | 1: 736          |
| <b>Secondary Antibodies</b>              |                |                |                 |
| Alexa 555 Anti-Mouse (Life Technologies) | Goat           | Mouse IgG      | 1:15000         |
